# Supplementary material for: Nanoreactor of sarcosine oxidase-embedded ZIFs activates fluorescent response for diagnosis of prostate cancer
Source: Royal Society of Chemistry journal article supplement (doi:10.1039/d1nj06169k), 2022-01-01
Supplement: d1nj06169k1.pdf [file d1nj06169k1.pdf]

## Nanoreactor of Sarcosine Oxidase Embedded ZIFs Activates Fluorescent Response for Diagnosis of Prostate Cancer

Qianqian Hu<sup>a, c, #</sup>, Guoning Chen<sup>a, #</sup>, Lu Wang<sup>a</sup>, Xia Cui<sup>a</sup>, Chun Chang<sup>a</sup>, Qiang Fu<sup>a, b, \*</sup>

<sup>a</sup> Department of Pharmaceutical Analysis, School of Pharmacy, Xi'an Jiaotong University, Xi'an 710061, China

<sup>b</sup> Department of Pharmaceutical Analysis, College of Pharmacy, Shenzhen Technology University, Shenzhen 518118, China

<sup>c</sup> Department of Pharmacy, The Second Affiliated Hospital of Xi'an Medical University, Xi'an 710038, China

\* Correspondence: Qiang Fu; E-mail: fuqiang@mail.xjtu.edu.cn.

# These authors contributed equally to this work.

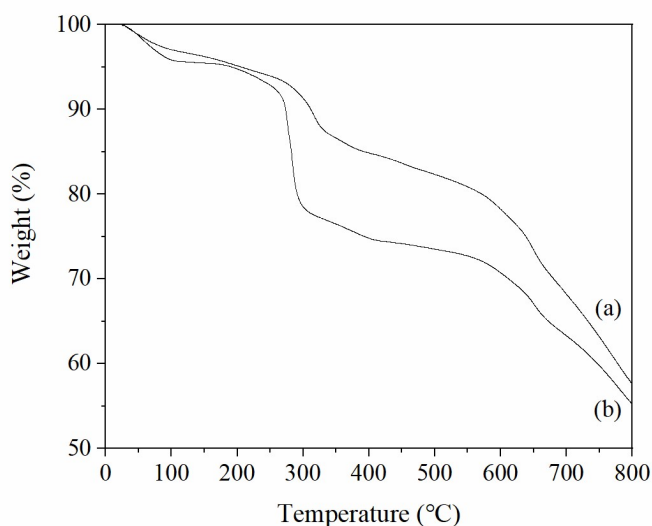

Fig. S1 TGA curves of ZIF-8 (a) and SOX@ZIF-8 (b).

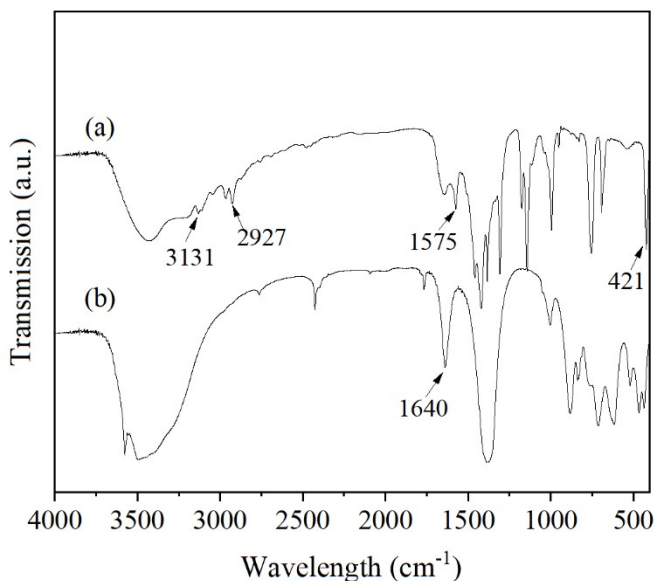

Fig. S2 FT-IR spectra of ZIF-8 (a) and SOX@ZIF-8 (b).

Table S1 The result of nitrogen adsorption-desorption adsorption

| Materials | Surface area ( $\text{m}^2 \text{g}^{-1}$ ) | Pore volume ( $\text{m}^3 \text{g}^{-1}$ ) | Pore size (nm) |
|-----------|---------------------------------------------|--------------------------------------------|----------------|
| ZIF-8     | 1689.76                                     | 0.31                                       | 21.9           |
| SOX@ZIF-8 | 4.75                                        | 0.23                                       | 41.7           |

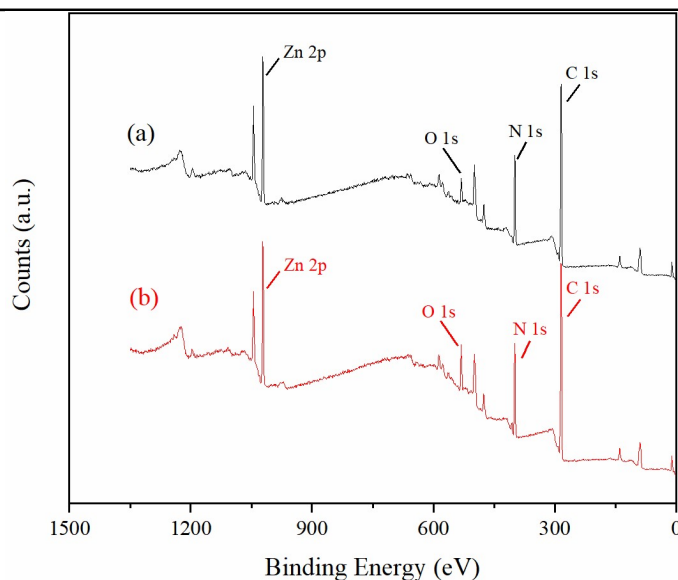

Fig. S3 X-ray photoelectron spectra (XPS) of ZIF-8 (a) and SOX@ZIF-8 (b).

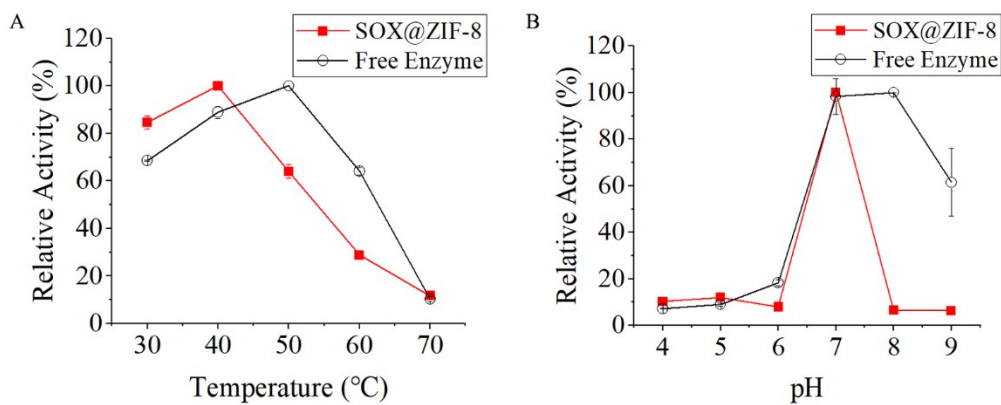

Fig. S4 Optimization of catalytic conditions for SOX@ZIF-8 and free enzyme (n=3)

(A) temperature; (B) pH.

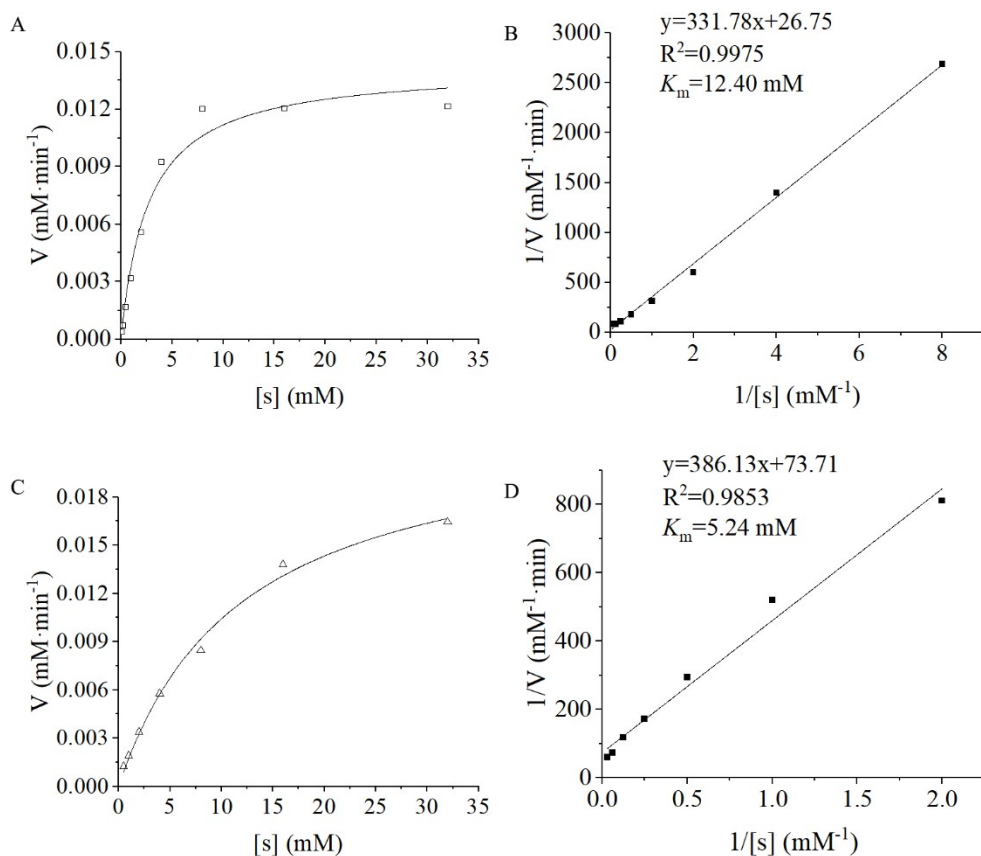

Fig. S5 Enzymatic kinetics of SOX@ZIF-8 and free enzyme. (A) kinetic curve of reaction between SOX@ZIF-8 and sarcosine; (B) Lineweaver-Burk plots of reaction between SOX@ZIF-8 and sarcosine; (C) kinetic curve of reaction between free enzyme and sarcosine; (D) Lineweaver-Burk plots of reaction between free enzyme and sarcosine.
